# Supplementary material
Source: PubMed Central journal article supplement (PMC5860917)
Supplement: NIHMS949903-supplement-Tables_1_and_2.pdf [file NIHMS949903-supplement-Tables_1_and_2.pdf]

Table 1

## Select Wave 1 Resident Participant Characteristics

| Characteristic                           | Mean/Median | Min - Max |
|------------------------------------------|-------------|-----------|
| <u>Age (years)</u>                       | 84/85       | 58 - 96   |
|                                          | Frequency   | %         |
| <u>Gender</u>                            |             |           |
| Female                                   | 17          | 61        |
| Male                                     | 11          | 39        |
| <u>Race</u>                              |             |           |
| Black, African American descent          | 10          | 36        |
| White, European descent                  | 18          | 64        |
| <u>Marital status</u>                    |             |           |
| Married                                  | 3           | 12        |
| Widowed                                  | 18          | 69        |
| Divorced                                 | 3           | 12        |
| Never married                            | 2           | 8         |
| <u>Education</u>                         |             |           |
| Less than high school                    | 1           | 4         |
| High school                              | 8           | 31        |
| Some college                             | 5           | 19        |
| College degree                           | 3           | 12        |
| Post graduate                            | 9           | 34        |
| <u>Self-rated health</u>                 |             |           |
| Excellent                                | 1           | 4         |
| Good                                     | 10          | 36        |
| Fair                                     | 10          | 36        |
| Poor                                     | 2           | 7         |
| Unable to report                         | 5           | 18        |
| <u>Activities of daily living (ADLs)</u> |             |           |
| Some or total help with 2                | 6           | 21        |
| Some or total help with 3 or more        | 16          | 57        |
| <u>Instrumental ADLs</u>                 |             |           |
| Some or total help with 2                | 2           | 10        |
| Some or total help with 3 or more        | 23          | 82        |
| <u>Receives medication assistance</u>    | 21          | 75        |
| <u>Use of assistive devices</u>          |             |           |
| Cane                                     | 4           | 14        |
| Walker                                   | 14          | 50        |
| Wheelchair                               | 11          | 14        |
| Electric wheelchair                      | 1           | 4         |
| <u>Has cognitive impairment</u>          | 11          | 39        |

Table 2

## Wave 1 Number and Type of Interview Participants and Observation Activities by Site

| WAVE 1                                                                                                                                                                                                                                                                                                                                                                                                                                                         | Hillside <sup>a</sup> | Garden House <sup>b</sup> | Feld House <sup>c</sup> | Oakridge Manor <sup>d</sup> | Totals |
|----------------------------------------------------------------------------------------------------------------------------------------------------------------------------------------------------------------------------------------------------------------------------------------------------------------------------------------------------------------------------------------------------------------------------------------------------------------|-----------------------|---------------------------|-------------------------|-----------------------------|--------|
| # of Convoys Enrolled/Target                                                                                                                                                                                                                                                                                                                                                                                                                                   | 3/2                   | 5/5                       | 10/8                    | 10/10                       | 28/25  |
| # of Interviews by Type                                                                                                                                                                                                                                                                                                                                                                                                                                        |                       |                           |                         |                             |        |
| Focal Residents (FR) without Cognitive Impairment                                                                                                                                                                                                                                                                                                                                                                                                              | 1                     | 3                         | 8                       | 5                           | 17     |
| FRs with Cognitive Impairment                                                                                                                                                                                                                                                                                                                                                                                                                                  | 2                     | 2                         | 2                       | 5                           | 11     |
| Informal Caregivers                                                                                                                                                                                                                                                                                                                                                                                                                                            | 9                     | 19                        | 27                      | 9                           | 64     |
| Administrators                                                                                                                                                                                                                                                                                                                                                                                                                                                 | 2                     | 1                         | 1                       | 1                           | 5      |
| Facility Direct Care Workers                                                                                                                                                                                                                                                                                                                                                                                                                                   | 1                     | 9                         | 6                       | 8                           | 24     |
| External Care Workers                                                                                                                                                                                                                                                                                                                                                                                                                                          | 1                     | 8                         | 8                       | 4                           | 21     |
| Total Interviews                                                                                                                                                                                                                                                                                                                                                                                                                                               | 16                    | 42                        | 52                      | 32                          | 142    |
| Participant Observation                                                                                                                                                                                                                                                                                                                                                                                                                                        |                       |                           |                         |                             |        |
| # of Field Visits                                                                                                                                                                                                                                                                                                                                                                                                                                              | 78                    | 182                       | 303                     | 246                         | 809    |
| # of Observation Hours                                                                                                                                                                                                                                                                                                                                                                                                                                         | 105                   | 416                       | 1,136                   | 568                         | 2,224  |
| <sup>a</sup> small personal care home, rural location, privately owned, most residents White; <sup>b</sup> medium-sized personal care home with a dementia care unit, suburban, privately-owned, most residents White; <sup>c</sup> medium-sized personal care home, suburban, foundation-run, all residents White; <sup>d</sup> large assisted living community with a dementia care unit, urban location, corporately-owned, most residents African American |                       |                           |                         |                             |        |
